# Supplementary material for: Raman microspectroscopy demonstrates reduced mineralization of subchondral bone marrow lesions in knee osteoarthritis patients
Source: PubMed Central journal article supplement — Bone Rep. 2020 Apr 22;12:100269. doi: 10.1016/j.bonr.2020.100269 (PMC7210419; doi:10.1016/j.bonr.2020.100269), 2020-04-22
Supplement: mmc1.pdf [file mmc1.pdf]

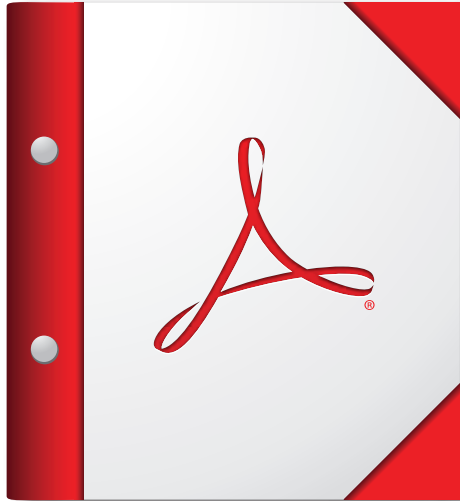

**For the best experience, open this PDF portfolio in  
Acrobat X or Adobe Reader X, or later.**

[Get Adobe Reader Now!](#)
